# Supplementary figures and images for: Natural Products Diversity in Plant-Insect Interaction between Tithonia diversifolia (Asteraceae) and Chlosyne lacinia (Nymphalidae)
Source: MDPI journal article supplement (doi:10.3390/molecules24173118), 2019-08-28

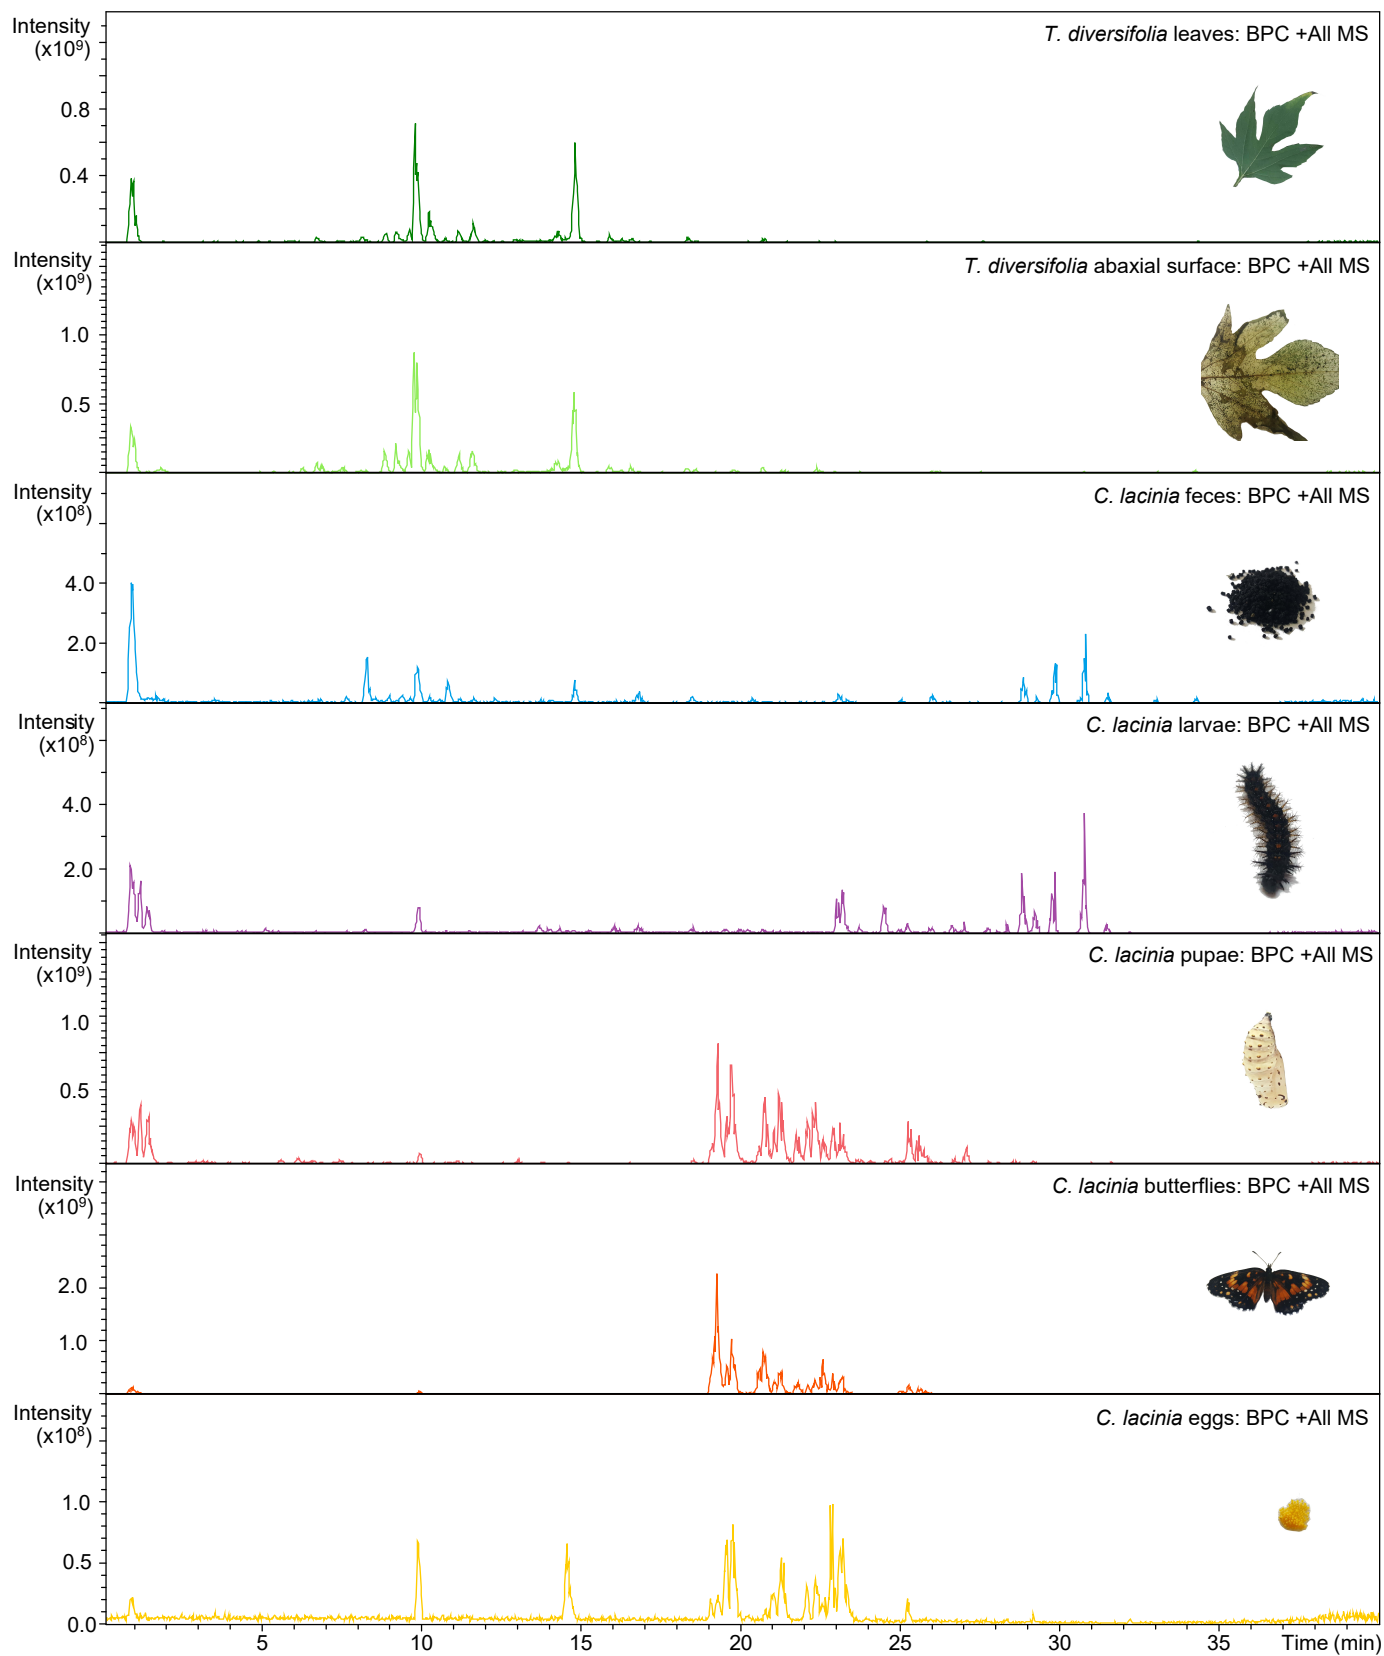

Supplement: s1 [file s1]

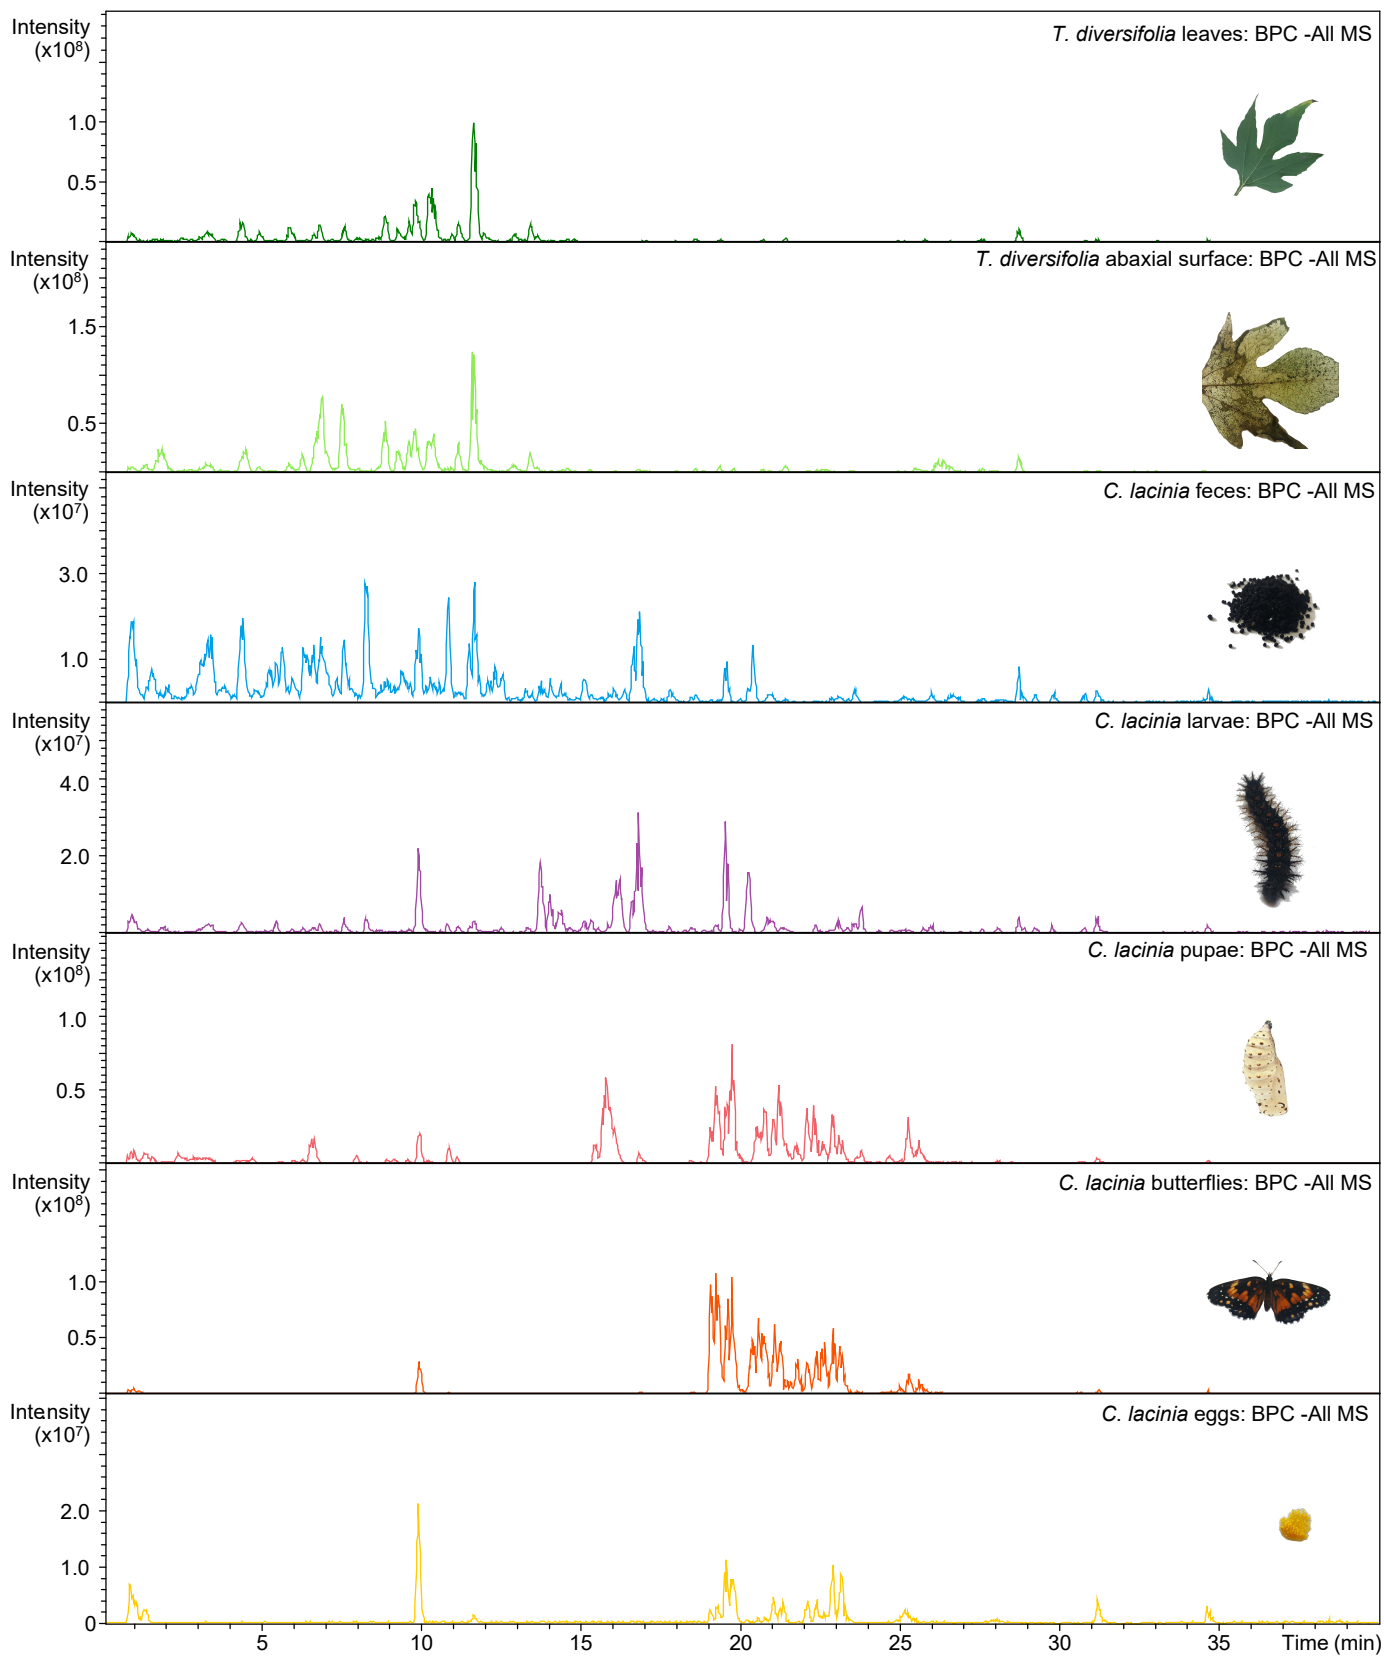

Supplement: s1 [file s1]
